# Supplementary material
Source: HighWire-hosted journal article supplement (https://bmjopenquality.bmj.com/highwire/filestream/136021/field_highwire_adjunct_files/1/ds6008.pdf)
Supplement: ds6008.pdf [file ds6008.pdf]

| <b>Audit Measure</b>          | <b>Pre-intervention</b> | <b>Post-intervention</b> | <b>P value</b> | <b>Significance</b> |
|-------------------------------|-------------------------|--------------------------|----------------|---------------------|
| Date recorded                 | 91.7%                   | 100.0%                   | 0.489          | Not significant     |
| Time recorded                 | 58.3%                   | 87.0%                    | 0.049          | Significant         |
| Indication recorded           | 100.0%                  | 100.0%                   | 1.000          | Not significant     |
| Pre-medication recorded       | 16.7%                   | 26.7%                    | 0.494          | Not significant     |
| Consent recorded              | 66.7%                   | 87.0%                    | 0.168          | Not significant     |
| Ultrasonography recorded      | 60.0%                   | 86.7%                    | 0.134          | Not significant     |
| LA use recorded               | 66.7%                   | 95.7%                    | 0.023          | Significant         |
| Drain site recorded           | 41.7%                   | 69.6%                    | 0.0798         | Not significant     |
| Drain size recorded           | 58.3%                   | 78.3%                    | 0.212          | Not significant     |
| Drain length recorded         | 16.7%                   | 52.2%                    | 0.0145         | Significant         |
| Method secured recorded       | 41.7%                   | 52.2%                    | 0.564          | Not significant     |
| Post-procedure advice         | 66.7%                   | 43.5%                    | 0.147          | Not significant     |
| Nursing observation sheet use | 79.2%                   | 87.0%                    | 0.701          | Not significant     |
| Nursed on respiratory ward    | 37.5%                   | 69.6%                    | 0.025          | Significant         |

**Figure 1. Results of data points recorded when inserting chest drain pre and post-intervention**

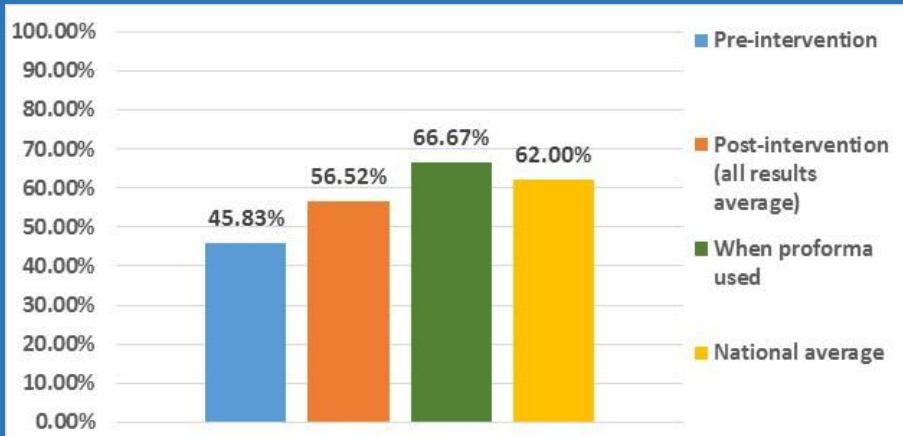

**Figure 2. Comparison of written consent obtained pre-intervention, post-intervention, when proforma exclusively used and national average. Target = 98%**

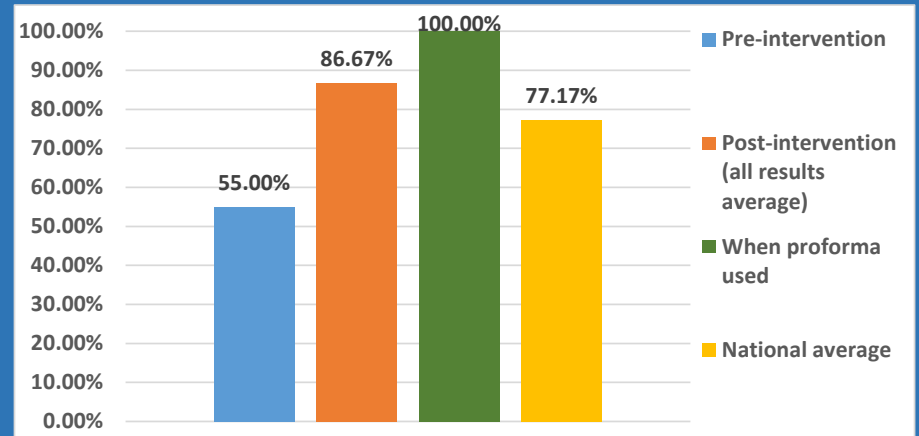

**Figure 3. Comparison of use of bedside ultrasonography pre-intervention, post-intervention, when proforma exclusively used and national average. Target = 100%**

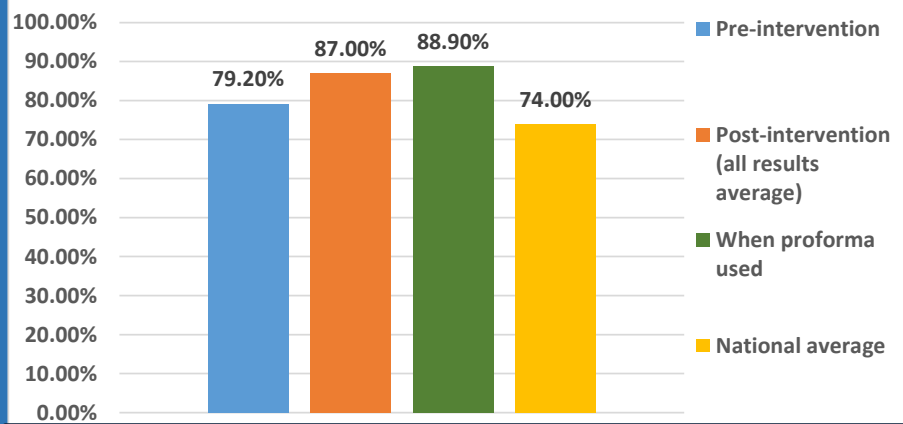

**Figure 4. Comparison of use of nursing drain observation sheets pre-intervention, post-intervention, when proforma exclusively used and national average. Target = 100%**

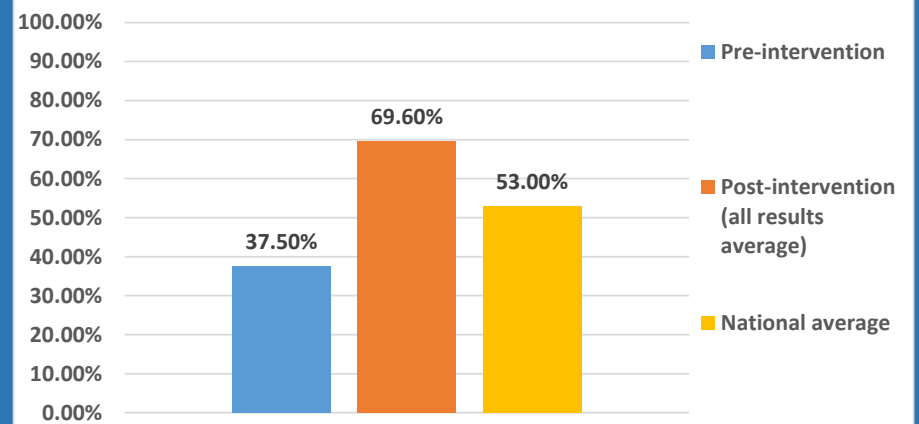

**Figure 5. Comparison of care on respiratory ward pre-intervention, post-intervention and national average. Target = 100%**
